# Supplementary material
Source: publisher figshare collection journal article supplement (https://acs.figshare.com/ndownloader/files/4584919)
Supplement: Supplementary file 1 [file 4584919]

## Supporting Information

### Design and synthesis of a cyclic double mutant peptide (cyclo(87-99)[A<sup>91</sup>, A<sup>96</sup>]MBP<sub>87-99</sub>) induces altered responses in mice after conjugation to mannan: implications in the immunotherapy of multiple sclerosis

Maria Katsara,<sup>1,2</sup> George Deraos,<sup>2</sup> Theodore Tselios,<sup>2</sup> Minos-Timotheos Matsoukas,<sup>2</sup> Irene Friligou,<sup>2</sup> John Matsoukas,<sup>2</sup> and Vasso Apostolopoulos<sup>1,\*</sup>

#### Contents

Compositional analysis (Table 1) data were collected from 6M HCl hydrosylates (150°C, 1 h) using a Beckmann 6,300 high performance analyzer. The two TLC solvent systems used were *n*-butanol/acetic acid/water (4/1/1) (BAW) - TLC R<sub>f</sub> = 0.22 and chloroform/methanol/ammonia (CMA) - TLC R<sub>f</sub> = 0.62. The purity of MBP<sub>87-99</sub>[A<sup>91</sup>, A<sup>96</sup>] peptide as analyzed by analytical HPLC using Lichrosorb RP-18 reversed phase semi-preparative column with 7 µm packing material. The peptides were 99 % pure as analyzed by mass spectrometry (ESI-MS)

**Table 1.** Amino acid analysis of cyclo(87-99)[A<sup>91</sup>,A<sup>96</sup>]MBP<sub>87-99</sub>

| TLC<br>(CMA) | TLC<br>(BAW) | Val  | His  | Phe  | Ala  | Asn  | Ile  | Thr  | Arg  | Pro  |
|--------------|--------------|------|------|------|------|------|------|------|------|------|
| 0.62         | 0.22         | 1.93 | 0.96 | 1.95 | 1.94 | 0.96 | 0.92 | 1.97 | 1.00 | 0.95 |

Compositional analysis data were collected from 6M HCl. The two TLC

Solvents used were BAW and CMA
